# Supplementary material for: Endemic Burkitt lymphoma: a complication of asymptomatic malaria in sub-Saharan Africa based on published literature and primary data from Uganda, Tanzania, and Kenya
Source: Malar J. 2020 Jul 28;19:239. doi: 10.1186/s12936-020-03312-7 (PMC7385955; doi:10.1186/s12936-020-03312-7)
Supplement: Supplementary file 1 — Additional file 1: Table S1. A list of articles with used as sources for relevant data about malaria conditions in East Africa. [file 12936_2020_3312_MOESM1_ESM.xlsx]

## Sheet: Articles
Supplementary Table 1. A list of articles with used as sources for relevant data about malaria conditions in East Africa
Complication		Article PMID #	Patients Article Reivewed Sample Size (Exclusive)	Condition Sample Size	Symptoms due to Malaria	Multiple Seizures	Headaches	Weakness/Lethargy/ Fatigue	Diarrhea	Myalgia (Muscle Pain/Aches)	Nausea/Vomiting	Signs due to Malaria	Anemia (<11 g/dL)	Cough	Fever (>37.5⁰C)	Temperature (Median + IQR)	Temperature (Mean + SD)	% of population	Coma	Blantyre coma scale	Hepatosplemegaly	Jaundice	Pallor	Respiratory Distress	Lab Tests due to Malaria	Hemoglobin	Hb (Median + IQR)	Hb (Mean + SD)	Normal (>11 g/dL)	Mild (8.0-10.9 g/dL)	Moderate (5.1-7.9 g/dL)	Severe (<5 g/dL)	Platelet Count	Platelets (Median + IQR) (x103)	Platelets (Mean + SD) (x103)	Normal (150,000-300,000 Platelets/uL)	Low (<150,000 Platelets/uL)	White Blood Cell	WBC (Median + IQR) (x103)	WBC (Mean + SD) (x103)	High (>10,000 cells/uL)	Normal (<10,000 cells/uL)	Parasite Tests	+/- RDT Test	GMPD (parasites/uL)	GMPD (Median + IQR) (x103)	GMPD (Mean + SD) (x103)	Mild (<10000 parasites/uL)	Severe (>10000 parasites/uL)
Asymptomatic Malaria	Asymptomatic	16474069	205	102	-							-			-		YES								-	-							-					-					-		-
		30843638	819	819	-							-			-										-	-							-					-					-	YES	-
		30457091	979	965	-							-			-										-	-							-					-					-		-
		24806160	1075	308	-							-			-										-	-							-					-					-		-	YES	YES	YES	YES
		23589533	740	740	-							-			-										-	-		YES	YES	YES	YES	YES	-					-					-		-
		23710648*	348	184	-							-			-										-	-							-	YES	YES	YES	YES	-	YES	YES	YES	YES	-		-
Uncomplicated Malaria	Mild	24806160	1075	253	-							-			-										-	-							-					-					-		-	YES	YES	YES	YES
		20408849	356	23	-	YES			YES		YES	-		YES	-	YES	YES	YES					YES		-	-	YES	YES	YES	YES	YES	YES	-	YES	YES	YES	YES	-	YES	YES	YES	YES	-		-
		23358640	2092	1078	-							-			-					YES	YES	YES		YES	-	-							-					-					-		-
		11502317	1914	138	-							-			-										-	-							-					-					-	YES	-
		14525636	53	22	-							-			-										-	-							-					-					-		-
	Moderate	24806160	1075	132	-							-			-										-	-							-					-					-		-	YES	YES	YES	YES
		20408849	356	200	-	YES			YES		YES	-		YES	-	YES	YES	YES		YES	YES	YES	YES	YES	-	-	YES	YES	YES	YES	YES	YES	-	YES	YES	YES	YES	-	YES	YES	YES	YES	-		-
		15642962	1239	184	-		YES	YES		YES		-			-										-	-							-					-					-		-
		14525636		18	-							-			-										-	-							-					-					-		-
Severe Malaria	Hyperparasitemia	23358640	2092	402	-	YES		YES				-			-	YES	YES	YES	YES	YES	YES	YES	YES	YES	-	-	YES	YES	YES	YES	YES	YES	-	YES	YES	YES	YES	-	YES	YES	YES	YES	-		-	YES	YES	YES	YES
	Prostration	11103309	-	-	-		YES	YES		YES		-			-					YES					-	-							-					-					-		-
		24806160	1075	39	-							-			-										-	-							-					-					-		-	YES	YES	YES	YES
		24639372	241	35	-							-			-						YES	YES			-	-							-					-					-		-
		12224575	3500	89	-							-			-										-	-							-	YES	YES	YES	YES	-					-		-
		17519413	58239	3223	-	YES						-			-		YES								-	-		YES	YES	YES	YES	YES	-					-					-		-
		22438807	307	153	-							-			-										-	-							-					-	YES	YES	YES	YES	-		-
	Anemia	24806160	1075	40	-							-			-										-	-							-					-					-		-	YES	YES	YES	YES
		24639372	241	54	-							-			-							YES			-	-							-					-					-		-
		20408849	356	133	-	YES			YES		YES	-		YES	-	YES	YES	YES					YES		-	-							-					-					-		-
		23358640	2092	558	-							-			-					YES	YES			YES	-	-	YES	YES	YES	YES	YES	YES	-	YES	YES	YES	YES	-	YES	YES	YES	YES	-		-
	Cerebral	11103309	-	-	-					YES		-			-					YES					-	-							-					-					-		-
		24806160	1075	102	-							-			-										-	-							-					-					-		-	YES	YES	YES	YES
		24639372	241	15	-							-			-							YES			-	-							-					-					-		-
		23358640	2092	174	-	YES						-			-	YES	YES	YES	YES		YES			YES	-	-	YES	YES	YES	YES	YES	YES	-	YES	YES	YES	YES	-	YES	YES	YES	YES	-		-
		24748325	1230	513	-		YES		YES		YES	-		YES	-										-	-							-					-					-		-
		12973645	7195	151	-			YES				-			-										-	-							-					-					-		-
Burkitt Lymphoma	BL non-EMBLEM	31157502	341	180	-							-			-										-	-		YES	YES	YES	YES	YES	-		YES	YES	YES	-		YES	YES	YES	-	YES	-
		21363976	2602	2602	-							-			-										-	-							-					-					-		-
		22047912	1237	1237	-							-			-										-	-							-					-					-		-
Table notes: Yes indicates that article was a source of data for the variable described by the column heading
The studies include 4,019 eBL cases from three studies and 80,532 children reportd in 18 studies
[truncated: 13 more columns]
